# Supplementary material for: Mn-Based Methacrylated Gellan Gum Hydrogels for MRI-Guided Cell Delivery and Imaging
Source: MDPI journal article supplement (doi:10.3390/bioengineering10040427), 2023-03-28
Supplement: s1 [file s1]

## Supporting Information

### *Mn-Based Methacrylated Gellan Gum Hydrogels for MRI-Guided Cell Delivery and Imaging*

Sílvia Vieira, Paulina Strymecka, Luiza Stanaszek, Joana Silva-Correia, Katarzyna Drela, Michał

Fiedorowicz, Izabela Malysz-Cymborska, Mirosław Janowski, Rui Luís Reis, Barbara Łukomska, Piotr

Walczak and Joaquim Miguel Oliveira \*

#### 1. Rheological Characterization: Phase Angle and Shear Viscosity

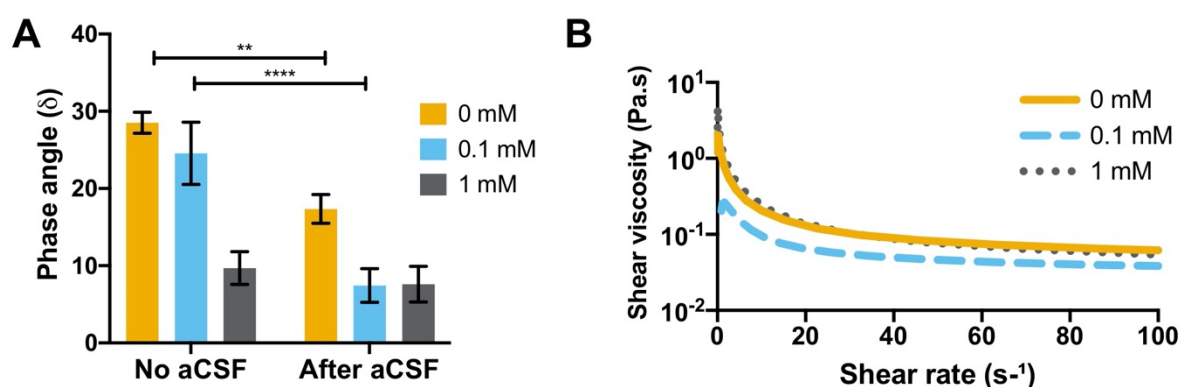

**Figure S1 - Rheologic characterization of Mn-based hydrogels.** A – Hydrogels phase angle before and after addition of aCSF. Results presented as average $\pm$ SD of the last registered minute, of at least 3 different samples; \*\* represents statistical difference between sample of GG-MA only hydrogels (0 mM) before and after addition of aCSF with  $p < 0.0022$ ; \*\*\*\* represents statistical difference between sample of GG-MA hydrogels supplemented with 0.1 mM MnCl<sub>2</sub>,  $p < 0.0001$ ; B – Shear viscosity of the different hydrogel formulations, along a shear rate ramp. Shear viscosity drastically decreases upon increasing on the shear rate. Results presented as average,  $n=4$ .

## 2. Biocompatibility: Injection with 18G needle

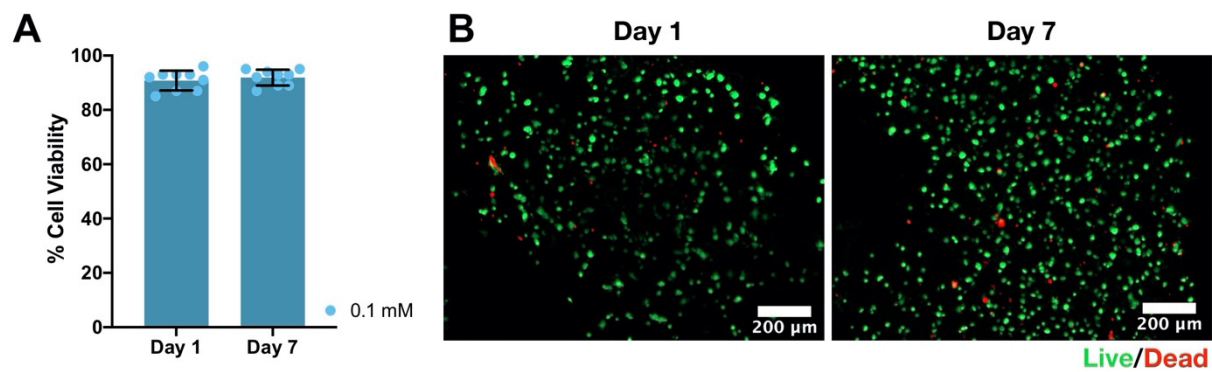

**Figure S2 - Cell encapsulation in GG-MA hydrogel supplemented with 0.1 mM.** A- Cell viability after 1 and 7 days of culture (average $\pm$ SD, n=3); B - Fluorescence microscopy images of Live/dead staining after 1 and 7 days of incubation. Live cells showed as green and dead cells as red. Scale bar: 200  $\mu$ m.
